# Shotgun Immunoproteomic Approach for the Discovery of Linear B Cell Epitopes in Biothreat Agents *Francisella tularensis* and *Burkholderia pseudomallei*

Patrik D'haeseleer<sup>1\*</sup>, Nicole M. Collette<sup>1</sup>, Victoria Lao<sup>1</sup>, Brent W. Segelke<sup>1</sup>, Steven S. Branda<sup>2</sup>, Magdalena Franco<sup>1</sup>

<sup>1</sup>Lawrence Livermore National Laboratory, Livermore, CA, USA

<sup>2</sup>Sandia National Laboratories, Livermore CA 94550, USA

## \*Correspondence:

Patrik D'haeseleer  
dhaeseleer2@llnl.gov

**Keywords:** Francisella, Burkholderia, immunoproteome, B cell epitope, antigen, peptide vaccine

## Abstract

Peptide-based subunit vaccines are coming to the forefront of current vaccine approaches, with safety and cost-effective production among their top advantages. Peptide vaccine formulations consist of multiple synthetic linear epitopes that together trigger desired immune responses that can result in robust immune memory. The advantages of peptide epitopes are their simple structure, ease of synthesis, and ability to stimulate immune responses by means that do not require complex 3D conformation. Identification of linear epitopes is currently an inefficient process that requires thorough characterization of previously identified full-length protein antigens, or laborious techniques involving genetic manipulation of organisms. In this study, we apply a newly developed generalizable screening method that enables efficient identification of B cell epitopes in the proteomes of pathogenic bacteria. As a test case, we used this method to identify epitopes in the proteome of *Francisella tularensis* (Ft), a Select Agent with a well-characterized immunoproteome. Our screen identified many peptides that map to known antigens, including verified and predicted outer membrane proteins and extracellular proteins, validating the utility of this approach. We then used the method to identify seroreactive peptides in the less characterized immunoproteome of Select Agent *Burkholderia pseudomallei* (Bp). This screen revealed known Bp antigens as well as proteins that have not been previously identified as antigens. The present workflow is easily adaptable to detecting peptide targets relevant to the immune systems of other mammalian species, including humans (depending upon the availability of convalescent sera from patients), and could aid in accelerating the discovery of B cell epitopes and development of vaccines to counter emerging biological threats.

## INTRODUCTION

Development of an effective vaccine against a biothreat agent or emerging pathogen is a costly and cumbersome process that can take years to decades to complete. The identification of antigens that stimulate protective immunity against a pathogen represents a significant bottleneck in the typical vaccine development process. Our study addressed the need to accelerate this process by testing the

40 feasibility of a platform for efficient identification of immunoreactive peptides that could be utilized  
41 as candidates for development of peptide-based vaccines.

42 Peptide-based vaccines represent the next generation of vaccines, with great potential to provide  
43 rapid protection against biothreats and emerging pathogens. Peptide vaccine formulations consist of  
44 multiple synthetic linear epitopes that together trigger immune responses resulting in robust immune  
45 memory. This multi-epitope approach can be broadly protective across divergent strains (*e.g.*, the  
46 first universal influenza vaccine to enter phase III clinical trials was a peptide vaccine) and effective  
47 for pathogens with complex life cycles (*e.g.*, several malaria peptide vaccines are currently in clinical  
48 trials) (1–3). Due to their lack of complex secondary and tertiary structure, peptides can be easily  
49 synthesized, multiplexed into vaccine formulations, and efficiently screened for efficacy.  
50 Consequently, peptide-based vaccines represent promising candidates for rapid response medical  
51 countermeasures against infectious disease.

52 Current strategies for epitope identification depend upon detection of epitopes within an individual  
53 full-length protein, a low-throughput approach that requires prior knowledge of the antigenic protein  
54 and its sequence. Technologies to screen for epitopes at the whole proteome level have been  
55 developed (*e.g.*, proteomic microarrays, phage and yeast display); however, these technologies  
56 require extensive use of synthetic biology and other time-consuming methodologies (*e.g.*, library  
57 construction, peptide/protein array preparation, heterologous protein expression) (3–8). Another  
58 major disadvantage of display technologies and use of non-native expression systems is that these  
59 methods do not reliably replicate the native properties of the antigenic proteins, including their post-  
60 translational modifications, which can lead to inaccurate results.

61 In this study, proteome-wide screening for linear B cell epitopes was achieved using native  
62 proteomes isolated from the pathogen of interest and convalescent sera from infected animals. This  
63 strategy holds several advantages over the currently available methods for epitope discovery: It does  
64 not require prior knowledge of antigenicity or antigen structure, and obviates need for complex and  
65 laborious experimental techniques such as preparation of display libraries and heterologous protein  
66 expression. Our approach was designed to enable identification of the protein antigen and,  
67 importantly, the antigenic regions within the identified antigen, such that these short linear peptides  
68 can be immediately synthesized and tested for efficacy in vaccine formulations.

69 In this study, we focused on two intracellular bacterial pathogens, *Francisella tularensis* (Ft) and  
70 *Burkholderia pseudomallei* (Bp), organisms which pose a high risk for misuse as bioweapons and  
71 therefore are considered Tier 1 Select Agents by the US Centers for Disease Control and Prevention.  
72 The mortality rates of both pathogens are high, and there is currently no licensed vaccine available  
73 for either agent (9–11). Humoral immunity plays an important role in developing immune protection  
74 to both of these intracellular pathogens, making them good model organisms for the purposes of this  
75 study (12–17). In addition, the immunoproteome of Ft has been thoroughly characterized (10,18,19),  
76 such that the previously published data could be compared to the datasets generated in our study. We  
77 leveraged a merged dataset of 164 previously identified antigens, corresponding to ~10% of Ft  
78 proteome. The Bp immunoproteome is not as well characterized compared to that of Ft: our reference  
79 dataset contained only 61 previously identified seroreactive proteins, corresponding to ~1% of the Bp  
80 proteome (20,21). Consequently, the dataset resulting from the Bp screen has revealed many proteins  
81 that have not been previously categorized as antigens.

## 82 MATERIALS AND METHODS

### 83 Bacterial strains and culture conditions

84 *Francisella tularensis* SCHU S4 $\Delta$ clpB (“Ft- $\Delta$ clpB”) was a generous gift from Dr. Wayne Conlan  
85 (National Research Council Canada). Stock cultures were prepared by growing Ft- $\Delta$ clpB on  
86 Chocolate II Agar plates supplemented with hemoglobin and isovitalex (BD 221169) for 48 hours at  
87 37°C. Bacteria were harvested by scraping confluent lawns into Mueller Hinton (MH) broth  
88 containing 20% (w/v) sucrose, and stored at -80°C at a concentration 10<sup>8</sup> - 10<sup>9</sup> CFU/mL.  
89 *Burkholderia pseudomallei* mutant  $\Delta$ purM (“Bp82”) was obtained from BEI resources (NR-51280).  
90 Frozen stocks were prepared by growing the bacteria to log phase in Luria-Bertani (LB) broth,  
91 adding glycerol to achieve 20% (w/v) with the bacteria at a final concentration of 10<sup>8</sup> - 10<sup>9</sup> CFU/mL,  
92 and storing aliquots at -80°C. For immunizations, the Ft- $\Delta$ clpB and Bp82 bacterial stocks were  
93 thawed and diluted in sterile phosphate-buffered saline (PBS) to the specified concentrations used for  
94 dosing. For protein extraction purposes, Ft- $\Delta$ clpB and Bp82 were propagated to log phase in MH and  
95 LB broth, respectively.

### 96 Protein extraction and peptide preparation

97 Ft- $\Delta$ clpB and Bp82 were grown to log phase in 300 mL of MH broth or LB broth, respectively, at  
98 37°C with shaking (250 rpm). The bacteria were harvested by centrifugation at 3200 x g for 10 min at  
99 4°C, washed once with 10 mL of PBS, and the pellet flash frozen using dry ice. The bacteria in the  
100 pellet were lysed by subjecting them to two freeze-thaw cycles (alternating between room  
101 temperature and dry ice). For protein extraction, the lysate was mixed with Bper Complete Bacterial  
102 Protein Extraction Reagent (Thermo Fisher Scientific, cat# 89822), and the mixture incubated at  
103 room temperature for 15 min with rotational shaking. The mixture was then subjected to two rounds  
104 of sonication (1 sec pulses, timed output 10 sec, at 50% power) using a Heat Systems Ultrasonics  
105 sonicator (model W-385), and centrifuged at 16,000 x g for 10 min. Proteins were precipitated with  
106 acetone and washed twice with ethanol. Air-dried protein pellets were solubilized using 8M urea and  
107 Protease Max surfactant (Promega, V2071), then digested with trypsin (Promega, V5111) using the  
108 in-solution digestion protocol provided by the manufacturer (Promega, TB373). Completion of the  
109 trypsinization reaction was confirmed by gel electrophoresis. The trypsin-digested proteins were  
110 filtered using 10K MWCO concentrators (Pierce) at 10,000 x g for 20 min at 20°C, and the filtrates  
111 (purified peptides) stored at -20°C.

### 112 Mice and immunizations

113 Mouse immunization studies were carried out in strict accordance with the recommendations in the  
114 Guide for the Care and Use of Laboratory Animals and the National Institutes of Health. Appropriate  
115 efforts were made to minimize suffering of animals. All animals were housed in ABSL2 conditions  
116 in an AAALAC-accredited facility, and the protocol (Protocol 270, renumbered 284, approved  
117 10/09/2017) was approved by the LLNL Institutional Animal Care and Use Committee (IACUC).  
118 For immunization, 6 week-old female specific-pathogen-free BALB/c-Elite and C57BL/6J-Elite mice  
119 (Charles River) were injected subcutaneously with 10<sup>6</sup> CFU Ft- $\Delta$ clpB (BALB/c and C57BL/6J), or  
120 intradermally with 10<sup>7</sup> CFU Bp82 (BALB/c), and boosted at 2 weeks. No adjuvants were used.  
121 Matched PBS-dosed controls were included for each injection route. Course of infection was  
122 monitored by performing daily health scoring and weight measurements. Mice that developed  
123 infection wounds (Ft only) were topically treated with Dakin’s solution to encourage wound healing,  
124 and allowed to remain on test so long as they did not meet humane endpoint criteria (any mice with  
125 ~20% body weight loss or overt signs of morbidity were humanely euthanized). Sera from euthanized

126 mice were excluded from analysis due to lack of immunity to the pathogen. Convalescent sera were  
127 harvested from resilient mice at 4 weeks post-infection, *via* cardiac puncture terminal bleeding under  
128 inhaled isoflurane anesthesia followed by blood fractionation [centrifugation at 3800 x g for 15 min  
129 in microtainer serum separator tubes (BD)]. Sera were stored at -80°C.

### 130 **SDS-PAGE and Western analysis**

131 Western analysis was performed to confirm seropositivity of infected mice. Bacterial lysates were  
132 prepared using Bper Complete Bacterial Protein Extraction Reagent (Thermo Fisher Scientific, cat#  
133 89822), combined with Laemmli loading buffer (BioRad), and boiled at 95°C for 5 min. Samples  
134 were loaded onto 4-15% acrylamide gels (Mini-Protean TGX, BioRad) and separated by  
135 electrophoresis at 120 V for 1 hr. The proteins were transferred from the gels to nitrocellulose  
136 membranes (BioRad). Membranes were blocked with Tris-buffered saline plus 0.05% Tween 20  
137 (TBS-T) plus 5% nonfat dry milk, at room temperature for 1 hr or at 4°C for 16 hrs. The membranes  
138 were hybridized with mouse sera at 1:500 dilution in TBS-T plus 5% milk, at room temperature for 2  
139 hrs; washed three times with TBS-T; and then incubated with goat anti-mouse antibodies conjugated  
140 to HRP (Pierce, prod#1858413), at 1:5000 dilution in TBS-T plus 5% milk, at room temperature for  
141 1 hr. After three TBS-T washes, the membranes were developed using SuperSignal™ West Pico  
142 PLUS Chemiluminescent Substrate (Thermo Fisher Scientific).

### 143 **Enzyme-linked immunosorbent assay (ELISA)**

144 ELISA was performed to assess the level of seropositivity of infected mice. Wells were coated with  
145 bacterial lysates and incubated at 4°C for 16 hrs. After three washes with PBS plus 0.1% Tween-20  
146 (PBS-T), sera from infected mice diluted to 1:100 with PBS were added to the wells and incubated at  
147 room temperature for 1 hr. Following four PBS-T washes, the wells were incubated for 1 hr with  
148 Recombinant Protein A/G peroxidase (Pierce, cat#32490) diluted at 1:5000 with PBS. After four  
149 PBS-T washes, 1-Step ABTS Substrate Solution (cat# 37615) was added, and after 15 min incubation  
150 any colorimetric changes in the wells were detected using a microplate reader (Tecan M200 Pro).

### 151 **Affinity purification of immunoreactive peptides**

152 Magnetic beads coated with protein G (Invitrogen, cat#10007D) were used to capture antibodies  
153 from sera from infected mice, following the manufacturer's "Dynabeads Protein G  
154 immunoprecipitation" protocol (MAN0017348). The antibody-coated beads were then incubated  
155 with purified peptides at room temperature for 45 min. Following three PBS washes, immunoreactive  
156 peptides were eluted from the beads using citrate buffer (pH 3). Input, unbound, and eluate fractions  
157 were flash frozen with dry ice and stored at -20°C. As a negative control, antibodies from uninfected  
158 (PBS treated) mice were used to detect any background resulting from nonspecific binding of  
159 peptides to beads or antibodies.

### 160 **Mass spectrometry (MS)**

161 The input, unbound, and eluate fractions recovered from antibody-coated beads (see preceding  
162 section) were desalted using an Empore SD solid phase extraction plate; lyophilized; reconstituted in  
163 0.1% TFA; and analyzed *via* LC-MS/MS by MS Bioworks (Ann Arbor, Michigan), using a Waters  
164 M-Class UPLC system interfaced to a ThermoFisher Fusion Lumos mass spectrometer. Peptides  
165 were loaded on a trapping column and eluted over a 75 µm analytical column at 350 nL/min. Both  
166 columns were packed with Luna C18 resin (Phenomenex). A 2 hr gradient was employed. The mass  
167 spectrometer was operated in a data dependent HCD mode, with MS and MS/MS performed in the

168 Orbitrap at 60,000 FWHM resolution and 15,000 FWHM resolution, respectively. The instrument  
169 was run with a 3 sec cycle for MS and MS/MS.

## 170 MS data processing

171 Data were analyzed using Mascot (Matrix Science) with the following parameters: Enzyme:  
172 Trypsin/P; Database: UniProt *F. tularensis* SCHU S4 or UniProt *B. pseudomallei* strain 1026b  
173 (forward and reverse appended with common contaminants and mouse IgG sequences); Fixed  
174 modification: Carbamidomethyl (C); Variable modifications: Oxidation (M), Acetyl (N-term), Pyro-  
175 Glu (N-term Q), Deamidation (N/Q); Mass values: Monoisotopic; Peptide Mass Tolerance: 10 ppm;  
176 Fragment Mass Tolerance: 0.02 Da; Max Missed Cleavages: 2; Mascot DAT files were parsed into  
177 Scaffold Proteome Software for validation, filtering and to create a non-redundant list per sample.  
178 Data were filtered using 1% protein and peptide FDR and requiring at least one unique peptide per  
179 protein.

## 180 Bioinformatic analysis

181 Each experiment typically consisted of three sets of data: “Input” (total bacterial peptides without  
182 affinity purification), “Control” (peptides purified from beads coated with antibodies from uninfected  
183 mice), and “Experiment” (peptides purified from beads coated with antibodies from infected mice).

184 LC-MS/MS data were analyzed at the peptide level based on the Total Ion Current (TIC, total area  
185 under the MS2 curve), rather than rolling up peptide scores into a protein abundance metric as would  
186 be done in standard proteomics. Input datasets were first normalized against each other based on  
187 median ratios for the peptides occurring in every Input dataset. The more sparse Control and  
188 Experiment datasets were then normalized against their respective Input dataset based on median  
189 ratios as well. Since each animal can be expected to raise a different set of antibodies, we counted  
190 how often peptides occurred more abundantly in the experiment vs control, rather than focusing on  
191 the average log fold change in abundance. Each peptide was assigned an enrichment score, by adding  
192 +1, 0, or -1 based on whether the experimental peptide level was greater than, equal to, or lower than  
193 the control level in each experiment. Statistical significance was evaluated by randomizing this  
194 matrix of +1/0/-1 values.

195 Average Amino Acid Conservation Scores (AAACS) were calculated using the ConSurf web server  
196 (22) with default parameter values, using near full-length protein structure homology models from  
197 SWISS-MODEL or crystal structures from PDB where available. The AAACS for the peptide is the  
198 average conservation score for the residues in the peptides, with negative scores indicating more  
199 highly conserved regions (23).

200 In addition to AAACS, we also scored peptides based on how many complete sequenced genomes of  
201 pathogenic *B. pseudomallei* and *F. tularensis* they occurred in, similar to the conservation analysis in  
202 EpitoCore (24). We downloaded proteomes for all 110 *B. pseudomallei* strains with complete  
203 genome sequences available through NCBI. For *F. tularensis*, 36 strains with complete genomes  
204 were available through NCBI, but several of these corresponded to the less-pathogenic *novicida*,  
205 *holartica* and *mediasiatica* subspecies, so we decided to focus exclusively on the 17 available *F.*  
206 *tularensis* subsp. *tularensis* complete genomes. We identified homologs with  $\geq 90\%$  sequence identity  
207 to the proteins containing our top scoring peptides in Tables 1 and 2, and then scored each peptide  
208 based on how often they had a 100% identical hit in each homolog.

209 We used two state-of-the-art computational B cell epitope prediction tools to evaluate all of the  
210 peptides in our proteomic data that match the proteins in Tables 1 and 2. Peptides were submitted to  
211 the iBCE-EL web server for scoring (25). In addition, proteins were submitted to the Bepipred Linear  
212 Epitope Prediction 2.0 tool on the IEDB website (26), and peptides were then scored based on their  
213 average predicted residue score. For selected proteins with an available structure model, we also used  
214 the Discotope 2.0 web server for prediction of potentially discontinuous B-cell epitopes from protein  
215 3D-structure (27).

## 216 **RESULTS**

### 217 **Overview of immunoproteome screen**

218 In this study, we tested the feasibility of proteome-wide screening for linear B cell epitopes using  
219 peptide extracts from target bacteria and sera from infected animals. The method requires: (1)  
220 isolation of peptides from lysates generated from the target bacteria; (2) challenge of the host (in this  
221 case, mouse) with the target bacteria, followed by collection of convalescent serum; (3) mixing of the  
222 bacterial peptides and convalescent serum, to allow peptide antigens to bind to their cognate  
223 antibodies in the serum; and (4) recovery of bound peptides for identification through mass  
224 spectrometry (Figure 1). We applied this method to two bacterial Select Agent pathogens:  
225 *Francisella tularensis* and *Burkholderia pseudomallei*. Infection with attenuated strains of these  
226 pathogens [*F. tularensis* SCHU S4 $\Delta$ clpB and *B. pseudomallei*  $\Delta$ purM (strain Bp82)] has been shown  
227 to stimulate development of protective immunity against their corresponding fully-virulent parental  
228 strains (*F. tularensis* SCHU S4 and *B. pseudomallei* K96245, respectively) (28,29), suggesting that  
229 convalescent sera recovered from hosts infected with these attenuated pathogens must contain  
230 protective antibodies.

231 Briefly, proteins purified from pathogen lysates were digested with trypsin to generate a peptide  
232 library. Mice were infected with a sublethal dose of Ft- $\Delta$ clpB or Bp82, and immune status assessed  
233 through measurement of seroreactivity to pathogen lysate *via* enzyme-linked immunosorbent assay  
234 (ELISA) or Western blot analysis (Figure 2). Antibodies purified from the convalescent sera of  
235 infected mice were immobilized on magnetic beads and then incubated with pathogen-derived  
236 peptides to allow formation of antigen-antibody complexes. Peptides recovered from the immobilized  
237 antibodies were identified *via* liquid chromatography coupled with tandem mass spectrometry.

### 238 **Bioinformatic identification of enriched antigenic peptides**

239 The peptides recovered from infected mice (Experiment peptidome) were compared to those  
240 recovered from mock-infected mice (Control peptidome); a total of 8 pairs of peptidomes were  
241 collected for Ft, and 9 pairs for Bp. For Ft, we found that 44 of the recovered peptides had an  
242 enrichment score of 6 or greater, whereas only 20.1  $\pm$  6.1 peptides would be expected at random  
243 ( $p=5 \times 10^{-5}$ ). For Bp, 46 peptides had an enrichment score of 6 or greater, whereas only 17.8  $\pm$  4.3  
244 peptides would be expected at random ( $p=3 \times 10^{-12}$ ). The enriched peptides included those derived  
245 from a number of protective antigens identified in previous studies, as well as predicted outer  
246 membrane and extracellular proteins (Tables 1 and 2). There were many examples of multiple  
247 enriched peptides originating from the same protein (highlighted in bold in the tables), a further  
248 indication that enrichment was not random but rather due to immune response to a discrete set of  
249 bacterial proteins.

250 Note that we used C57BL/6J mice for two of the eight Ft experimental samples, because of  
251 previously reported differences in protection and antibody response after immunization of C57BL/6J

252 and BALB/c mice with Ft- $\Delta$ clpB by Twine *et al* (30). Analyzing the BALB/c Ft samples separately  
253 yielded a very similar set of results as in Table 1, but with lower p-value for the enrichment due to  
254 the smaller number of samples (results not shown). Therefore, we decided to combine the data and  
255 focus on antibody responses in common between both strains of mice. Although Twine *et al* reported  
256 an antibody response against chaperonin protein GroL only in BALB/c mice, our data shows that  
257 there are several GroL epitopes that are enriched in samples from both mouse strains (see Table 1 and  
258 Figure 4).

259 Immunoproteomics analysis of the antibody response to *F. tularensis* using human or mouse sera has  
260 identified 164 antibody targets out of a total of 1667 proteins (~10% of the entire Ft proteome)  
261 (10,18,19). Out of the 1923 peptides that have hits in at least two Ft datasets, 876 peptides match  
262 known antigenic proteins. Given those numbers, we would expect only 20 such peptides to show up  
263 at random in our list of 44 in table 1, but instead we observe that 38/44 peptides in the list correspond  
264 to known antigens - and almost two-fold enrichment ( $p=2.79 \times 10^{-9}$ ). The immune response to *B.*  
265 *pseudomallei* has not been studied in as much depth as for *Francisella*. So even though Bp with 6203  
266 protein coding genes has a genome that is more than three times as large as that of Ft, we found only  
267 61 known antigens identified in previous studies (20,21) (~1% of the entire proteome). Our list of 47  
268 top Bp peptides in Table 1 includes one known antigen, which does not qualify as a statistically  
269 significant enrichment primarily because of the much smaller total number of known antigens for Bp.

270 Prioritizing highly conserved epitopes is a critical consideration for vaccine development, as highly  
271 conserved epitopes can induce broadly protective immunity, and reduce the risk that emergence of  
272 pathogen variants will render the vaccine ineffective (31). ~90% of the top scoring peptides were  
273 found to be present in 90% or more of the fully sequenced pathogenic *F. tularensis* and *B.*  
274 *pseudomallei* strains (see Supplementary tables S1 and S2). In addition, we can target peptides that  
275 show even deeper evolutionary conservation based on their Average Amino Acid Conservation Score  
276 (AAACS), reflecting parts of the protein that may be important for its function (22) (see  
277 Supplementary tables S1 and S2).

278 Note that while some of the proteins in Tables 1 and 2 have homologs in human and mouse (e.g.  
279 mitochondrial DnaK), the peptides recovered here are unique to the bacterial versions. Peptides that  
280 are only one or two amino acids different from human or mouse versions are likely less suitable as  
281 vaccine candidates and are marked with a subscript 1 or 2 respectively in the tables. For vaccine  
282 design, we may also want to prioritize peptides which do not tend to occur in healthy human  
283 microbiome.

284 Figure 3 shows the 46 Ft DnaK peptides that were detected in at least two Experiment samples,  
285 including the 8 that are in our list of 44 enriched Ft peptides (Table 1).

286 Lu *et al.* (32) used hydrogen/deuterium exchange-mass spectrometry (DXMS) to experimentally  
287 identify one discontinuous and four linear B-cell epitopes for a selection of mouse monoclonal  
288 antibodies against GroL. Figure 4 shows the 32 Ft GroL peptides that were detected in at least two  
289 Experiment samples in our study, including the 4 that are in our list of 44 enriched Ft peptides (Table  
290 1). Note that one of these 4 peptides (DNNTIIDGAGEK) overlaps with a linear epitope  
291 (NTTIIDGAGEKEAIAKRVINIK) and a discontinuous epitope (SEDLSMKLEETNM—  
292 NNTIIDGAGEKEAIA), while a second enriched peptide (EGVITVEEGK) is directly adjacent to  
293 another of the linear epitopes (FEDEL). According to the Immune Epitope Database (IEDB) (33),  
294 these are the only experimentally validated B-cell epitopes for Ft. IEDB also lists four *B.*

295 *pseudomallei* antigens that have been assayed for B-cell epitopes, none of which overlap with the  
296 proteins in Table 1.

## 297 **DISCUSSION**

298 We have developed a widely applicable shotgun immunoproteomic method that enables efficient  
299 identification of B cell epitopes in the proteomes of pathogens. The results of this study have  
300 revealed a significant enrichment of peptides derived from previously identified antigens and vaccine  
301 candidates, validating the method's efficacy. This method was designed to identify linear epitopes  
302 efficiently without the need of genetic manipulation or other experimental techniques that can be  
303 costly and labor intensive. Attenuated strains made the optimization of this proof-of-concept study  
304 more efficient; however, the availability of an attenuated strain for the target organism does not  
305 represent a limitation, as our strategy could be applied to fully virulent strains of pathogens as well.  
306 Although the present study was performed using a mouse model, the workflow could be easily  
307 adapted to detecting targets relevant to the human immune system, using convalescent sera from  
308 patients.

309 Utilizing peptide antigens for vaccine development has several advantages over typical vaccine  
310 development efforts. First, peptide vaccines represent a safer alternative to traditional vaccines,  
311 because the vaccine formulation is defined and contents are fully synthetic. Second, peptide vaccines  
312 have the potential to decrease the cost and production timeline, due to ease of synthesis and recent  
313 advances in improved peptide stability (3,34,35). In addition, once antigenic peptides are identified,  
314 screening for efficacy could represent a lesser challenge due to the possibility of multiplexing  
315 peptides during *in vivo* trials, rather than a one-at-a-time approach.

316 Among Ft proteins, the present screen identified multiple peptides for two well-characterized  
317 antigens, 60kDa chaperonin GroL (Q5NEE1) and chaperone protein DnaK (Q5NFG7). Both  
318 chaperonins have been previously implicated in virulence of *Francisella* (36–38), and are known to  
319 induce antibody production in mice and humans (18,39,40). These chaperonin proteins are important  
320 for facilitating folding of nascent proteins as well as post-translational modifications. They are also  
321 known as heat-shock proteins, as they protect cellular proteins from environmental stresses such as  
322 high temperature and low pH (40,41). Although their cellular localization is predicted to be  
323 cytoplasmic, they reportedly also associate with membrane proteins and are released into host cells  
324 during infection (40,42–44) perhaps contributing to their ability to stimulate various immune  
325 functions, including innate immunity, humoral immunity and cell-mediated immunity (36,40,45–48).  
326 Heat-shock proteins are good candidates for subunit vaccine design due to their ability to stimulate  
327 various immune responses without the need of adjuvant; in fact, both GroL and DnaK have been  
328 exploited for vaccine development efforts targeting *Francisella* and other pathogens (32,40,49,50).

329 Highly virulent Type A *Francisella* strains such as SCHU S4 can bind host plasminogen to the  
330 bacterial cell surface where it can be converted to plasmin, a serine protease that degrades opsonizing  
331 antibodies, inhibiting antibody-mediated uptake by macrophages (51,52). Among the 25 Ft proteins  
332 listed in Table 1, we find at least 3 that are known to be involved in plasminogen binding in  
333 *Francisella* or other pathogens, including conserved hypothetical lipoprotein LpnA (Q5NNGE4) (52),  
334 fructose-1,6-bisphosphate aldolase (Q5NF78) (53), and elongation factor Tu (Q5NID9) (54). These  
335 proteins could make for particularly attractive vaccine targets, because if we can interfere with their  
336 function before the pathogen has activated its plasmin-mediated antibody evasion, that would make it  
337 more susceptible to other antibodies as well.



338 Among the antigenic peptides identified in the Bp proteome are those belonging to Type VI secretion  
339 system component Hcp-1 and previously identified antigen 10kDa chaperonin GroES (55). Hcp-1  
340 was previously found to be a major virulence determinant in *Burkholderia* and recognized by sera  
341 from infected human patients and animals (56–58). Due to this, Hcp-1 has been interrogated as a  
342 potential candidate for *Burkholderia* vaccine development (56–58). Additionally, a peptide from an  
343 ankyrin repeat-containing protein (A0A0H3HJC) came up as one of the highest scoring peptides in  
344 our study. Ankyrin repeats are typically eukaryotic protein domains involved in protein-protein  
345 interactions (59), but have been co-opted by many bacterial pathogens as type IV secreted effector  
346 proteins to mimic or manipulate various host functions (60).

347 Recovery of peptides derived from several supposedly cytosolic enzymes may seem puzzling.  
348 However several “housekeeping” enzymes are known to be displayed on the surface of pathogens  
349 where they play a role in virulence (61). For example, our top scoring peptides from *B. pseudomallei*  
350 include two derived from enolase (A0A0H3HLA6). While enolase is primarily thought of as a key  
351 glycolytic enzyme, it is also expressed on the surface of a wide variety of bacterial and fungal  
352 pathogens, where it interacts with host plasminogen and is associated with invasion and virulence  
353 (62). Antibodies against enolase have been detected in a large variety of infectious and autoimmune  
354 diseases (63). It is as yet unknown whether enolase plays the same role in *Burkholderia*, but the  
355 protein is predicted to be present both in the cytoplasm and on the cell surface, and its production  
356 was found to be upregulated upon exposure to human lung epithelial cells (64). Other housekeeping  
357 proteins in our top scoring results whose homologs in other pathogens are known to play a role in  
358 adhesion, invasion, or virulence include elongation factor Tu (Q5NID9), malic enzyme/malate  
359 dehydrogenase (A0A0H3HP28, Q5NHC8), and fructose-1,6-bisphosphate aldolase (Q5NF78) (61).

360 Overall, this immunoproteomic workflow has identified numerous peptides mapping to previously  
361 identified antigens and subunit vaccine targets, predicted membrane-associated proteins, as well as  
362 uncharacterized proteins. The Ft datasets revealed a significant enrichment of peptides belonging to  
363 previously identified antigenic proteins in Experiment samples relative to their respective Control  
364 samples, providing validation to this approach. Interestingly, several of these known antigens also  
365 yielded multiple top scoring peptides in our analysis. Despite the large amount of prior  
366 immunoproteomic analysis on Ft, covering ~10% of the genome, experimentally validated B-cell  
367 epitopes are available for only a single protein, and our analysis captures two out of its five known  
368 epitopes. Due to the much smaller number of previously identified antigens for *Burkholderia*, we  
369 were not able to tell whether the enrichment in the Bp datasets was significant. More comprehensive  
370 immunogenic profiles could be achieved with the use of alternative enzymes with different  
371 specificities, since there is a risk of ablating epitopes that contain cut sites recognized by specific  
372 enzymes such as trypsin. Alternatively, performing incomplete digestion with one enzyme, or a  
373 cocktail of enzymes with different specificities, could improve the yield and diversity of identified  
374 epitopes.

375 Interestingly, we find no significant correlation between the peptides experimentally identified using  
376 the method described here, and computationally predicted linear B-cell epitope scores generated by  
377 state-of-the-art tools such as Bepipred 2.0 (26) and iBCE-EL (25) (see Supplementary tables S1 and  
378 S2), nor any significant correlation between the Bepipred 2.0 and iBCE-EL scores themselves.  
379 Accurate computational prediction of B-cell epitopes still poses a major challenge (65), highlighting  
380 the value of an unbiased experimental method to screen for antibody targets, as presented here. It is  
381 also possible that the tryptic peptides evaluated by this method do not score well as B-cell epitopes  
382 by tools such as iBCE-EL, which explicitly take into account sequence features at the beginning and  
383 end of the epitope. In cases where the tryptic peptide is too short to be used directly as a vaccine

384 candidate (some are as short as 6 residues), we may be able to use these computational tools to guide  
385 us in how to extend the peptide beyond its flanking trypsin cleavage sites.

386 Further confirmation that the identified sequences are B cell epitopes could be achieved through  
387 additional *in vitro* and *in vivo* experimentation (e.g., testing the reactivity of immune sera with  
388 synthesized candidate epitopes *via* ELISA or immunization studies). High throughput screening of  
389 peptides for efficacy is feasible due to recent advancements in solid phase peptide synthesis (SPPS),  
390 which enables efficient and cost-effective production of peptide candidates (3). For immunization  
391 studies, pools of multiple peptides could be incorporated into vaccine delivery systems containing  
392 adjuvants and T-helper epitopes known to stimulate the induction of adaptive immune response  
393 against peptide antigens, as reviewed in Skwarczynski et al (3).

394 Our immunoproteomic method represents a new tool for precise mapping of linear B cell epitopes.  
395 Generation of such immunogenic profiles for pathogens could provide an ample pool of candidates  
396 for further experimental validation and efficient vaccine development. Accelerating the discovery of  
397 B cell epitopes in the proteomes of pathogens will help fuel the development of peptide-based  
398 vaccines that have the potential to provide rapid solutions to biothreat agents and emerging  
399 pathogens.

#### 400 **Data Availability Statement**

401 The mass spectrometry proteomics data have been deposited to the ProteomeXchange Consortium  
402 via the PRIDE (66) partner repository with the dataset identifier PXD026300 and  
403 10.6019/PXD026300.

#### 404 **Conflict of Interest**

405 MF, NMC and PD are inventors on a provisional patent application for the method for rapid  
406 detection of immunogenic epitopes, filed by Lawrence Livermore National Security, LLC.

#### 407 **Author Contributions**

408 PD, NMC and MF contributed to conception and design of the study. NMC performed the *in vivo*  
409 experiments. VL provided laboratory support. VL and MF performed *in vitro* experimentation. PD  
410 performed the bioinformatics analysis. BWS and SSB provided critical input. All authors contributed  
411 to manuscript revision, read, and approved the submitted version

#### 412 **Funding**

413 This work was supported by Lawrence Livermore National Laboratory Directed Research and  
414 Development Program (LLNL LDRD) Labwide grant (18-LW-039) to MF, and by the LDRD  
415 program at Sandia National Laboratories, a multi-mission laboratory managed and operated by  
416 National Technology and Engineering Solutions of Sandia, LLC, a wholly owned subsidiary of  
417 Honeywell International, Inc., for the U.S. Department of Energy's National Nuclear Security  
418 Administration under contract DE-NA0003525. Work at LLNL was performed under the auspices of  
419 the U.S. Department of Energy by Lawrence Livermore National Laboratory under Contract DE-  
420 AC52-07NA27344. LLNL IM release number LLNL-JRNL-822446.

## 421 Acknowledgements

422 We thank Dr. Wayne Conlan (National Research Council Canada) for providing *Francisella*  
423 *tularensis* SCHU S4ΔclpB strain. Bp 82 reagent was obtained through BEI Resources, NIAID, NIH:  
424 *Burkholderia pseudomallei*, Strain Bp82 (Δ*purM*), NR-51280. Our thanks go to Michael Ford and  
425 MS Bioworks team for help with sample preparation troubleshooting and specialized mass  
426 spectrometry analyses. We also thank past and present members of our laboratories - Drs. Sahar El-  
427 Etr, José Peña, Amy Rasley, and Emilio Garcia - for useful discussions and critical input.

## 428 REFERENCES

- 429 1. Li W, Joshi MD, Singhanian S, Ramsey KH, Murthy AK. Peptide Vaccine: Progress and  
430 Challenges. *Vaccines Basel*. 2014 Jul 2;2(3):515–36.
- 431 2. Malonis RJ, Lai JR, Vergnolle O. Peptide-Based Vaccines: Current Progress and Future  
432 Challenges. *Chem Rev*. 2020 Mar 25;120(6):3210–29.
- 433 3. Skwarczynski M, Toth I. Peptide-based synthetic vaccines. *Chem Sci*. 2016 Feb 1;7(2):842–54.
- 434 4. Dudek NL, Perlmutter P, Aguilar MI, Croft NP, Purcell AW. Epitope Discovery and Their Use in  
435 Peptide Based Vaccines. *Curr Pharm Des*. 2010;16(28):3149–57.
- 436 5. Wang AP, Li N, Zhou JM, Chen YM, Jiang M, Qi YH, et al. Mapping the B cell epitopes within  
437 the major capsid protein L1 of human papillomavirus type 16. *Int J Biol Macromol*. 2018 Oct  
438 15;118:1354–61.
- 439 6. Zhao DM, Han KK, Huang XM, Zhang LJ, Wang HL, Liu N, et al. Screening and identification  
440 of B-cell epitopes within envelope protein of tembusu virus. *Virology*. 2018 Sep 17;15.
- 441 7. Bi Y, Jin Z, Wang Y, Mou S, Wang W, Wei Q, et al. Identification of Two Distinct Linear B Cell  
442 Epitopes of the Matrix Protein of the Newcastle Disease Virus Vaccine Strain LaSota. *Viral*  
443 *Immunol*. 2019 Jun;32(5):221–9.
- 444 8. Jaenisch T, Heiss K, Fischer N, Geiger C, Bischoff FR, Moldenhauer G, et al. High-density  
445 Peptide Arrays Help to Identify Linear Immunogenic B-cell Epitopes in Individuals Naturally  
446 Exposed to Malaria Infection. *Mol Cell Proteomics*. 2019 Apr;18(4):642–56.
- 447 9. Dienst FT. Tularemia: a perusal of three hundred thirty-nine cases. *J State Med Soc*. 1963  
448 Apr;115:114–27.
- 449 10. Fulton KM, Zhao X, Petit MD, Kilmury SLN, Wolfraim LA, House RV, et al. Immunoproteomic  
450 analysis of the human antibody response to natural tularemia infection with Type A or Type B  
451 strains or LVS vaccination. *Int J Med Microbiol IJMM*. 2011 Nov;301(7):591–601.
- 452 11. Gibney KB, Cheng AC. Reducing the melioidosis burden: public health, chronic disease  
453 prevention, or improved case management? *Lancet Infect Dis*. 2019 Aug;19(8):800–2.
- 454 12. Mara-Koosham G, Hutt JA, Lyons CR, Wu TH. Antibodies Contribute to Effective Vaccination  
455 against Respiratory Infection by Type A *Francisella tularensis* Strains. *Infect Immun*. 2011 Apr  
456 1;79(4):1770–8.

- 457 13. Ray HJ, Cong Y, Murthy AK, Selby DM, Klose KE, Barker JR, et al. Oral Live Vaccine Strain-  
458 Induced Protective Immunity against Pulmonary Francisella tularensis Challenge Is Mediated by  
459 CD4+ T Cells and Antibodies, Including Immunoglobulin A. *Clin Vaccine Immunol* CVI. 2009  
460 Apr;16(4):444–52.
- 461 14. Rhinehart-Jones TR, Fortier AH, Elkins KL. Transfer of immunity against lethal murine  
462 Francisella infection by specific antibody depends on host gamma interferon and T cells. *Infect*  
463 *Immun*. 1994 Aug;62(8):3129–37.
- 464 15. Hogan RJ, Lafontaine ER. Antibodies Are Major Drivers of Protection against Lethal Aerosol  
465 Infection with Highly Pathogenic Burkholderia spp. *mSphere* [Internet]. 2019 Jan 2 [cited 2021  
466 Mar 15];4(1). Available from: <https://www.ncbi.nlm.nih.gov/pmc/articles/PMC6315082/>
- 467 16. Jones SM, Ellis JF, Russell P, Griffin KF, Oyston PCF. Passive protection against Burkholderia  
468 pseudomallei infection in mice by monoclonal antibodies against capsular polysaccharide,  
469 lipopolysaccharide or proteins. *J Med Microbiol*. 2002;51(12):1055–62.
- 470 17. Khakhum N, Bharaj P, Myers JN, Tapia D, Kilgore PB, Ross BN, et al. Burkholderia  
471 pseudomallei  $\Delta$ tonB  $\Delta$ hcp1 Live Attenuated Vaccine Strain Elicits Full Protective Immunity  
472 against Aerosolized Melioidosis Infection. *mSphere* [Internet]. 2019 Jan 2 [cited 2021 Mar  
473 15];4(1). Available from: <https://www.ncbi.nlm.nih.gov/pmc/articles/PMC6315081/>
- 474 18. Kilmury SLN, Twine SM. The francisella tularensis proteome and its recognition by antibodies.  
475 *Front Microbiol*. 2010;1:143.
- 476 19. Nakajima R, Escudero R, Molina DM, Rodríguez-Vargas M, Randall A, Jasinskas A, et al.  
477 Towards Development of Improved Serodiagnostics for Tularemia by Use of Francisella  
478 tularensis Proteome Microarrays. *J Clin Microbiol*. 2016 Jul;54(7):1755–65.
- 479 20. Felgner PL, Kayala MA, Vigil A, Burk C, Nakajima-Sasaki R, Pablo J, et al. A Burkholderia  
480 pseudomallei protein microarray reveals serodiagnostic and cross-reactive antigens. *Proc Natl*  
481 *Acad Sci U S A*. 2009 Aug 11;106(32):13499–504.
- 482 21. Yi J, Simpanya MF, Settles EW, Shannon AB, Hernandez K, Pristo L, et al. Caprine humoral  
483 response to Burkholderia pseudomallei antigens during acute melioidosis from aerosol exposure.  
484 *PLoS Negl Trop Dis*. 2019 Feb;13(2):e0006851.
- 485 22. Ashkenazy H, Abadi S, Martz E, Chay O, Mayrose I, Pupko T, et al. ConSurf 2016: an improved  
486 methodology to estimate and visualize evolutionary conservation in macromolecules. *Nucleic*  
487 *Acids Res*. 2016 Jul 8;44(W1):W344–350.
- 488 23. Ren J, Ellis J, Li J. Influenza A HA's conserved epitopes and broadly neutralizing antibodies: a  
489 prediction method. *J Bioinform Comput Biol*. 2014 Oct;12(5):1450023.
- 490 24. Fiuza TS, Lima JPMS, de Souza GA. EpitoCore: Mining Conserved Epitope Vaccine Candidates  
491 in the Core Proteome of Multiple Bacteria Strains. *Front Immunol*. 2020;11:816.
- 492 25. Manavalan B, Govindaraj RG, Shin TH, Kim MO, Lee G. iBCE-EL: A New Ensemble Learning  
493 Framework for Improved Linear B-Cell Epitope Prediction. *Front Immunol*. 2018;9:1695.

- 494 26. Jespersen MC, Peters B, Nielsen M, Marcatili P. BepiPred-2.0: improving sequence-based B-cell  
495 epitope prediction using conformational epitopes. *Nucleic Acids Res.* 2017 Jul 3;45(W1):W24–9.
- 496 27. Kringelum JV, Lundegaard C, Lund O, Nielsen M. Reliable B cell epitope predictions: impacts  
497 of method development and improved benchmarking. *PLoS Comput Biol.* 2012;8(12):e1002829.
- 498 28. Conlan JW, Shen H, Golovliov I, Zingmark C, Oyston PC, Chen W, et al. Differential ability of  
499 novel attenuated targeted deletion mutants of *Francisella tularensis* subspecies *tularensis* strain  
500 SCHU S4 to protect mice against aerosol challenge with virulent bacteria: effects of host  
501 background and route of immunization. *Vaccine.* 2010 Feb 17;28(7):1824–31.
- 502 29. Propst KL, Mima T, Choi KH, Dow SW, Schweizer HP. A *Burkholderia pseudomallei*  
503 *deltapurM* mutant is avirulent in immunocompetent and immunodeficient animals: candidate  
504 strain for exclusion from select-agent lists. *Infect Immun.* 2010 Jul;78(7):3136–43.
- 505 30. Twine S, Shen H, Harris G, Chen W, Sjostedt A, Ryden P, et al. BALB/c mice, but not C57BL/6  
506 mice immunized with a  $\Delta$ clpB mutant of *Francisella tularensis* subspecies *tularensis* are protected  
507 against respiratory challenge with wild-type bacteria: association of protection with post-  
508 vaccination and post-challenge immune responses. *Vaccine.* 2012 May 21;30(24):3634–45.
- 509 31. Eickhoff CS, Terry FE, Peng L, Meza KA, Sakala IG, Van Aartsen D, et al. Highly Conserved  
510 Influenza T cell epitopes Induce Broadly Protective Immunity. *Vaccine.* 2019 Aug  
511 23;37(36):5371–81.
- 512 32. Lu Z, Rynkiewicz MJ, Madico G, Li S, Yang CY, Perkins HM, et al. B-cell epitopes in GroEL of  
513 *Francisella tularensis*. *PLoS One.* 2014;9(6):e99847.
- 514 33. Vita R, Mahajan S, Overton JA, Dhanda SK, Martini S, Cantrell JR, et al. The Immune Epitope  
515 Database (IEDB): 2018 update. *Nucleic Acids Res.* 2019 Jan 8;47(D1):D339–43.
- 516 34. Purcell AW, McCluskey J, Rossjohn J. More than one reason to rethink the use of peptides in  
517 vaccine design. *Nat Rev Drug Discov.* 2007 May;6(5):404–14.
- 518 35. Sun T, Han H, Hudalla GA, Wen Y, Pompano RR, Collier JH. Thermal stability of self-  
519 assembled peptide vaccine materials. *Acta Biomater.* 2016 Jan 15;30:62–71.
- 520 36. Noah CE, Malik M, Bublitz DC, Camenares D, Sellati TJ, Benach JL, et al. GroEL and  
521 lipopolysaccharide from *Francisella tularensis* live vaccine strain synergistically activate human  
522 macrophages. *Infect Immun.* 2010 Apr;78(4):1797–806.
- 523 37. Pechous RD, McCarthy TR, Zahrt TC. Working toward the future: insights into *Francisella*  
524 *tularensis* pathogenesis and vaccine development. *Microbiol Mol Biol Rev.* 2009 Dec;73(4):684–  
525 711.
- 526 38. Weiss DS, Brotcke A, Henry T, Margolis JJ, Chan K, Monack DM. In vivo negative selection  
527 screen identifies genes required for *Francisella* virulence. *Proc Natl Acad Sci U A.* 2007 Apr  
528 3;104(14):6037–42.

- 529 39. Havlasova J, Hernychova L, Brychta M, Hubalek M, Lenco J, Larsson P, et al. Proteomic  
530 analysis of anti-Francisella tularensis LVS antibody response in murine model of tularemia.  
531 *Proteomics*. 2005 May;5(8):2090–103.
- 532 40. Huntley JF, Conley PG, Hagman KE, Norgard MV. Characterization of Francisella tularensis  
533 outer membrane proteins. *J Bacteriol*. 2007 Jan;189(2):561–74.
- 534 41. Ericsson M, Tarnvik A, Kuoppa K, Sandstrom G, Sjostedt A. Increased synthesis of DnaK,  
535 GroEL, and GroES homologs by Francisella tularensis LVS in response to heat and hydrogen  
536 peroxide. *Infect Immun*. 1994 Jan;62(1):178–83.
- 537 42. Henderson B, Allan E, Coates AR. Stress wars: the direct role of host and bacterial molecular  
538 chaperones in bacterial infection. *Infect Immun*. 2006 Jul;74(7):3693–706.
- 539 43. Hickey TB, Thorson LM, Speert DP, Daffe M, Stokes RW. Mycobacterium tuberculosis Cpn60.2  
540 and DnaK are located on the bacterial surface, where Cpn60.2 facilitates efficient bacterial  
541 association with macrophages. *Infect Immun*. 2009 Aug;77(8):3389–401.
- 542 44. Lee BY, Horwitz MA, Clemens DL. Identification, recombinant expression, immunolocalization  
543 in macrophages, and T-cell responsiveness of the major extracellular proteins of Francisella  
544 tularensis. *Infect Immun*. 2006 Jul;74(7):4002–13.
- 545 45. Ashtekar AR, Zhang P, Katz J, Deivanayagam CC, Rallabhandi P, Vogel SN, et al. TLR4-  
546 mediated activation of dendritic cells by the heat shock protein DnaK from Francisella tularensis.  
547 *J Leukoc Biol*. 2008 Dec;84(6):1434–46.
- 548 46. Kol A, Bourcier T, Lichtman AH, Libby P. Chlamydial and human heat shock protein 60s  
549 activate human vascular endothelium, smooth muscle cells, and macrophages. *J Clin Invest*. 1999  
550 Feb;103(4):571–7.
- 551 47. Wallin RP, Lundqvist A, More SH, von Bonin A, Kiessling R, Ljunggren HG. Heat-shock  
552 proteins as activators of the innate immune system. *Trends Immunol*. 2002 Mar;23(3):130–5.
- 553 48. Valentino MD, Maben ZJ, Hensley LL, Woolard MD, Kawula TH, Frelinger JA, et al.  
554 Identification of T-cell epitopes in Francisella tularensis using an ordered protein array of  
555 serological targets. *Immunology*. 2011 Mar;132(3):348–60.
- 556 49. Ashtekar AR, Katz J, Xu Q, Michalek SM. A mucosal subunit vaccine protects against lethal  
557 respiratory infection with Francisella tularensis LVS. *PLoS One*. 2012;7(11):e50460.
- 558 50. Khan MN, Shukla D, Bansal A, Mustoori S, Ilavazhagan G. Immunogenicity and protective  
559 efficacy of GroEL (hsp60) of Streptococcus pneumoniae against lethal infection in mice. *FEMS  
560 Immunol Med Microbiol*. 2009 Jun;56(1):56–62.
- 561 51. Crane DD, Warner SL, Bosio CM. A novel role for plasmin mediated degradation of opsonizing  
562 antibody in the evasion of host immunity by virulent, but not attenuated, Francisella tularensis. *J  
563 Immunol Baltim Md 1950*. 2009 Oct 1;183(7):4593–600.
- 564 52. Clinton SR, Bina JE, Hatch TP, Whitt MA, Miller MA. Binding and activation of host  
565 plasminogen on the surface of Francisella tularensis. *BMC Microbiol*. 2010 Mar 12;10:76.

- 566 53. Shams F, Oldfield NJ, Wooldridge KG, Turner DPJ. Fructose-1,6-bisphosphate aldolase (FBA)-a  
567 conserved glycolytic enzyme with virulence functions in bacteria: “ill met by moonlight.”  
568 *Biochem Soc Trans.* 2014 Dec;42(6):1792–5.
- 569 54. Kunert A, Losse J, Gruszyn C, Hühn M, Kaendler K, Mikkat S, et al. Immune evasion of the  
570 human pathogen *Pseudomonas aeruginosa*: elongation factor Tuf is a factor H and plasminogen  
571 binding protein. *J Immunol Baltim Md 1950.* 2007 Sep 1;179(5):2979–88.
- 572 55. Varga JJ, Vigil A, DeShazer D, Waag DM, Felgner P, Goldberg JB. Distinct human antibody  
573 response to the biological warfare agent *Burkholderia mallei*. *Virulence.* 2012 Oct 1;3(6):510–4.
- 574 56. Burtnick MN, Brett PJ, Harding SV, Ngugi SA, Ribot WJ, Chantratita N, et al. The cluster 1 type  
575 VI secretion system is a major virulence determinant in *Burkholderia pseudomallei*. *Infect*  
576 *Immun.* 2011 Apr;79(4):1512–25.
- 577 57. Schell MA, Ulrich RL, Ribot WJ, Brueggemann EE, Hines HB, Chen D, et al. Type VI secretion  
578 is a major virulence determinant in *Burkholderia mallei*. *Mol Microbiol.* 2007 Jun;64(6):1466–  
579 85.
- 580 58. Whitlock GC, Deeraksa A, Qazi O, Judy BM, Taylor K, Propst KL, et al. Protective response to  
581 subunit vaccination against intranasal *Burkholderia mallei* and *B. pseudomallei* challenge.  
582 *Procedia Vaccinol.* 2010;2(1).
- 583 59. Li J, Mahajan A, Tsai M-D. Ankyrin repeat: a unique motif mediating protein-protein  
584 interactions. *Biochemistry.* 2006 Dec 26;45(51):15168–78.
- 585 60. Pan X, Lüthmann A, Satoh A, Laskowski-Arce MA, Roy CR. Ankyrin Repeat Proteins Comprise  
586 a Diverse Family of Bacterial Type IV Effectors. *Science.* 2008 Jun 20;320(5883):1651–4.
- 587 61. Pancholi V, Chhatwal GS. Housekeeping enzymes as virulence factors for pathogens. *Int J Med*  
588 *Microbiol IJMM.* 2003 Dec;293(6):391–401.
- 589 62. Lottenberg R, Minning-Wenz D, Boyle MD. Capturing host plasmin(ogen): a common  
590 mechanism for invasive pathogens? *Trends Microbiol.* 1994 Jan;2(1):20–4.
- 591 63. Terrier B, Degand N, Guilpain P, Servettaz A, Guillevin L, Mouthon L. Alpha-enolase: a target  
592 of antibodies in infectious and autoimmune diseases. *Autoimmun Rev.* 2007 Jan;6(3):176–82.
- 593 64. Al-Maleki AR, Mariappan V, Vellasamy KM, Tay ST, Vadivelu J. Altered Proteome of  
594 *Burkholderia pseudomallei* Colony Variants Induced by Exposure to Human Lung Epithelial  
595 Cells. *PloS One.* 2015;10(5):e0127398.
- 596 65. Sun P, Guo S, Sun J, Tan L, Lu C, Ma Z. Advances in In-silico B-cell Epitope Prediction. *Curr*  
597 *Top Med Chem.* 2019;19(2):105–15.
- 598 66. Perez-Riverol Y, Csordas A, Bai J, Bernal-Llinares M, Hewapathirana S, Kundu DJ, et al. The  
599 PRIDE database and related tools and resources in 2019: improving support for quantification  
600 data. *Nucleic Acids Res.* 2019 Jan 8;47(Database issue):D442–50.

## 601 FIGURES

602 **Figure 1:** Immunoproteome screening workflow. Schematic overview of high throughput approach  
603 for identification of seroreactive peptides in the proteomes of pathogens.

604 **Figure 2: A.** Representative course of mouse infection to obtain immune sera. Mice were infected  
605 with a sublethal dose of Bp and their weight monitored. The degree of weight loss correlates to the  
606 amount of antibodies detected in the sera. **B.** Representative Western blot of immune sera vs. non-  
607 immune sera. Bp protein lysates were analyzed by Western blotting using sera from infected and  
608 uninfected mice (Mouse 1–3). Antibodies from sera with the strongest signal are purified in this  
609 study and used to screen for immunogenic peptides. **C.** Representative ELISA results obtained from  
610 mice infected with Bp and Ft (red) in comparison with uninfected mice (PBS-treated mice, blue).  
611 Sera of some mice infected with Ft did not yield positive results because Ft infection led to lethal  
612 outcome and mice had to be euthanized during the course of immunization. Graphs represent two  
613 technical replicates for sera collected from each mouse.

614 **Figure 3:** Scoring for the 46 *F. tularensis* DnaK peptides detected in at least two Experiment  
615 samples. Each horizontal line segment indicates the position of a peptide along the length of the  
616 642aa DnaK protein, and its vertical position within each figure panel indicates its score for the  
617 metric indicated. The default score threshold suggested for each tool is shown with a horizontal line.  
618 **A.** Peptide enrichment score based on our proteomics results. An enrichment score of 8 indicates that  
619 the peptide was detected in greater abundance in all 8 Experiment samples relative to their respective  
620 Control samples. The threshold for inclusion in Table 1 was an enrichment score of  $\geq 6$ . **B.** B-cell  
621 epitope prediction score generated using iBCE-EL. Peptides scoring  $>0.35$  were predicted to be  
622 likely B-cell epitopes. **C.** B-cell epitope prediction score generated using Bepipred 2.0. The per-  
623 amino acid scores are indicated by the line graph. Regions of the protein scoring  $>0.5$  were predicted  
624 to likely contain B-cell epitopes. **D.** B-cell epitope prediction score generated using Discotope 2.0.  
625 The per-amino acid scores are indicated by the line graph. Regions of the protein scoring  $>-0.37$  were  
626 predicted to likely contain B-cell epitopes. **E.** Average Amino Acid Conservation Score (AAACS)  
627 based on Consurf analysis. Lower scores indicate greater degrees of evolutionary conservation. **F.**  
628 Number of fully sequenced *F. tularensis* subsp. *tularensis* genomes (17 analyzed) in which each  
629 peptide occurs.

630 **Figure 4:** The 32 *F. tularensis* GroL peptides detected in at least two Experiment samples. Horizontal  
631 line segments indicate the position of each peptide along the length of the 544aa GroL protein  
632 sequence. **A.** Peptide enrichment score based on our proteomics results, with a score of 8 indicating  
633 that the peptide was found in greater abundance in all 8 Experiment samples relative to their  
634 respective Control samples. The threshold for inclusion in Table 1 was a score of  $\geq 6$  or better. **B.** B-  
635 cell epitopes identified by DXMS by Lu et al. (32).

## 636 TABLES

637 **Table 1:** List of top scoring immunoreactive peptides identified for *Francisella tularensis*. The  
638 columns under “scores” indicate whether the peptide was over or underrepresented in each of the 8  
639 experimental samples compared to its control sample. Green: experiment $>$ control. Red:  
640 experiment $<$ control. White: peptide undetected in both experiment and control. Dark colors indicate  
641  $>2$ -fold difference in relative abundance. Proteins with multiple top scoring peptides are highlighted  
642 in bold.

643 <sup>a</sup>: known antigen. <sup>i</sup>: inner membrane. <sup>p</sup>: periplasmic. <sup>o</sup>: outer membrane. <sup>e</sup>: extracellular.



## Shotgun Immunoproteomic for Discovery of Linear B Cell Epitopes

644 <sup>1</sup>: peptide sequence is only a single amino acid away from a human or mouse peptide. <sup>2</sup>: peptide is  
 645 only two amino acids away from a human or mouse peptide.

646

| Protein name                                         | Accession             | Peptide                      | Scores |       |       |       |       |       |       |       |       |
|------------------------------------------------------|-----------------------|------------------------------|--------|-------|-------|-------|-------|-------|-------|-------|-------|
| Aminotransferase AspC1                               | Q5NGG1                | LPIDDAEK <sup>2</sup>        | Green  | Green | Green | Green | Green | Green | Green | Green | Green |
| <b>Glutamate dehydrogenase Gdh</b>                   | Q5NHR7 <sup>a</sup>   | FHPSVYSGIIK                  | Green  | Green | Green | Green | Green | Green | Green | Green | Green |
| Pyruvate dehydrogenase acetyltransferase AceF        | Q5NEX3 <sup>a</sup>   | VSQGSLLIK <sup>2</sup>       | Green  | Green | Green | Green | Green | Green | Green | Green | Green |
| <b>60 kDa chaperonin GroL</b>                        | Q5NEE1 <sup>a</sup>   | DRVDDALHATR <sup>2</sup>     | Green  | Green | Green | Green | Green | Green | Green | Green | Green |
| <b>Chaperone protein DnaK</b>                        | Q5NFG7 <sup>a</sup>   | NTADNLIHSSR                  | Green  | Green | Green | Green | Green | Green | Green | Green | Green |
| <b>Chaperone protein DnaK</b>                        | Q5NFG7 <sup>a</sup>   | SSSGLSEEDIEK                 | Green  | Green | Green | Green | Green | Green | Green | Green | Green |
| <b>60 kDa chaperonin GroL</b>                        | Q5NEE1 <sup>a</sup>   | DNTTIIDGAGEK                 | Green  | Green | Green | Green | Green | Green | Green | Green | Green |
| <b>60 kDa chaperonin GroL</b>                        | Q5NEE1 <sup>a</sup>   | EGVITVEEGK                   | Green  | Green | Green | Green | Green | Green | Green | Green | Green |
| <b>Catalase-peroxidase KatG</b>                      | Q5NGV7 <sup>a</sup>   | AVAQVYAENGNEQK               | Green  | Green | Green | Green | Green | Green | Green | Green | Green |
| Malate dehydrogenase Mdh                             | Q5NHC8 <sup>a</sup>   | FSGVPDNK <sup>1</sup>        | Green  | Green | Green | Green | Green | Green | Green | Green | Green |
| <b>Outer membrane protein 26 Omp26</b>               | Q5NES2 <sup>o</sup>   | EIPADQLGTIK                  | Green  | Green | Green | Green | Green | Green | Green | Green | Green |
| Succinate dehydrogenase flavoprotein SdhA            | Q5NIJ3 <sup>a,i</sup> | ITILATGGAGR                  | Green  | Green | Green | Green | Green | Green | Green | Green | Green |
| <b>ATP synthase subunit alpha AtpA</b>               | Q5NIK5 <sup>a</sup>   | GEVATDLTSPIEK                | Green  | Green | Green | Green | Green | Green | Green | Green | Green |
| <b>Elongation factor Ts Tsf</b>                      | Q5NHX9 <sup>a</sup>   | ESGKPAEIIK                   | Green  | Green | Green | Green | Green | Green | Green | Green | Green |
| <b>Elongation factor Ts Tsf</b>                      | Q5NHX9 <sup>a</sup>   | TVEAETLGAYIHGSK              | Green  | Green | Green | Green | Green | Green | Green | Green | Green |
| <b>Chaperone protein DnaK</b>                        | Q5NFG7 <sup>a</sup>   | IAGLEVK <sup>1</sup>         | Green  | Green | Green | Green | Green | Green | Green | Green | Green |
| Cell division protein FtsZ                           | Q5NI93 <sup>a</sup>   | KETEVTGASNAPK                | Green  | Green | Green | Green | Green | Green | Green | Green | Green |
| Trigger factor Tig                                   | Q5NH48                | GGVDTFENEIK                  | Green  | Green | Green | Green | Green | Green | Green | Green | Green |
| <b>ATP synthase subunit alpha AtpA</b>               | Q5NIK5 <sup>a</sup>   | SVDQALQTGIK                  | Green  | Green | Green | Green | Green | Green | Green | Green | Green |
| <b>Catalase-peroxidase KatG</b>                      | Q5NGV7 <sup>a</sup>   | NDNLSPQSVLSPLR               | Green  | Green | Green | Green | Green | Green | Green | Green | Green |
| Isocitrate dehydrogenase [NADP] Idh                  | Q5NET6 <sup>a</sup>   | VADIELETK <sup>2</sup>       | Green  | Green | Green | Green | Green | Green | Green | Green | Green |
| Fructose-1,6-bisphosphate aldolase FbaB              | Q5NF78 <sup>a</sup>   | KINIDTDLR                    | Green  | Green | Green | Green | Green | Green | Green | Green | Green |
| <b>Glutamate dehydrogenase Gdh</b>                   | Q5NHR7 <sup>a</sup>   | GFVHDPEGITTDEK               | Green  | Green | Green | Green | Green | Green | Green | Green | Green |
| <b>Succinate--CoA ligase [ADP-forming] beta SucC</b> | Q5NHF3 <sup>a</sup>   | PANFLDVGGGATK <sup>1</sup>   | Green  | Green | Green | Green | Green | Green | Green | Green | Green |
| <b>Chaperone protein DnaK</b>                        | Q5NFG7 <sup>a</sup>   | KVPYAVIK <sup>2</sup>        | Green  | Green | Green | Green | Green | Green | Green | Green | Green |
| Malonyl CoA-ACP transacylase                         | Q5NF69 <sup>a</sup>   | EPTTAVVQNFDAK                | Green  | Green | Green | Green | Green | Green | Green | Green | Green |
| Peroxiredoxin                                        | Q5NHA9 <sup>a</sup>   | KVPNVTFK <sup>2</sup>        | Green  | Green | Green | Green | Green | Green | Green | Green | Green |
| <b>Chaperone protein DnaK</b>                        | Q5NFG7 <sup>a</sup>   | IINEPTAAALAYGVDSK            | Green  | Green | Green | Green | Green | Green | Green | Green | Green |
| Conserved hypothetical lipoprotein LpnA              | Q5NGE4 <sup>a,o</sup> | ATVYTTYNNNPQGSVR             | Green  | Green | Green | Green | Green | Green | Green | Green | Green |
| <b>Elongation factor Tu Tuf</b>                      | Q5NID9 <sup>a</sup>   | TTVTGVEMFR                   | Green  | Green | Green | Green | Green | Green | Green | Green | Green |
| <b>Succinate--CoA ligase [ADP-forming] beta SucC</b> | Q5NHF3 <sup>a</sup>   | EVAESLIGK <sup>1</sup>       | Green  | Green | Green | Green | Green | Green | Green | Green | Green |
| 30S ribosomal protein S1 RpsA                        | Q5NI98 <sup>a</sup>   | KIELWDR <sup>2</sup>         | Green  | Green | Green | Green | Green | Green | Green | Green | Green |
| <b>Elongation factor Tu Tuf</b>                      | Q5NID9 <sup>a</sup>   | HYAHVDCPGHADYVK <sup>1</sup> | Green  | Green | Green | Green | Green | Green | Green | Green | Green |
| Transcription elongation factor GreA                 | Q5NFC6 <sup>a</sup>   | IVGEADIDNQK                  | Green  | Green | Green | Green | Green | Green | Green | Green | Green |
| <b>60 kDa chaperonin GroL</b>                        | Q5NEE1 <sup>a</sup>   | SFGTPTITK <sup>2</sup>       | Green  | Green | Green | Green | Green | Green | Green | Green | Green |
| <b>Aconitate hydratase AcnA</b>                      | Q5NII1 <sup>a</sup>   | GIPLVILAGK <sup>1</sup>      | Green  | Green | Green | Green | Green | Green | Green | Green | Green |
| <b>Chaperone protein DnaK</b>                        | Q5NFG7 <sup>a</sup>   | AYAEQAQAAVAQGGAK             | Green  | Green | Green | Green | Green | Green | Green | Green | Green |
| <b>Chaperone protein DnaK</b>                        | Q5NFG7 <sup>a</sup>   | FHDLVTAR <sup>2</sup>        | Green  | Green | Green | Green | Green | Green | Green | Green | Green |
| <b>Outer membrane protein 26 Omp26</b>               | Q5NES2                | DGSVGVVK <sup>1</sup>        | Green  | Green | Green | Green | Green | Green | Green | Green | Green |
| 3-oxoacyl-ACP reductase FabG                         | Q5NF68                | VALVTGASR <sup>1</sup>       | Green  | Green | Green | Green | Green | Green | Green | Green | Green |
| <b>Chaperone protein DnaK</b>                        | Q5NFG7 <sup>a</sup>   | ALEDAGLSK <sup>2</sup>       | Green  | Green | Green | Green | Green | Green | Green | Green | Green |
| Enoyl-ACP reductase [NADH] FabI                      | Q5NGQ3 <sup>i</sup>   | TLAASGISNFK                  | Green  | Green | Green | Green | Green | Green | Green | Green | Green |
| <b>Aconitate hydratase AcnA</b>                      | Q5NII1 <sup>a</sup>   | TAHTTTFEALAR                 | Green  | Green | Green | Green | Green | Green | Green | Green | Green |
| <b>Elongation factor Ts Tsf</b>                      | Q5NHX9 <sup>a</sup>   | LDVGEIEK <sup>1</sup>        | Green  | Green | Green | Green | Green | Green | Green | Green | Green |

647

648 **Table 2:** List of top scoring immunoreactive peptides identified for Burkholderia pseudomallei. The  
 649 columns under “scores” indicate whether the peptide was over or underrepresented in each of the 9  
 650 experimental samples compared to its control sample. Green: experiment>control. Red:  
 651 experiment<control. White: peptide undetected in both experiment and control. Dark colors indicate

## Shotgun Immunoproteomic for Discovery of Linear B Cell Epitopes

652 >2-fold difference in relative abundance. Proteins with multiple top scoring peptides are highlighted  
653 in bold.

654 <sup>a</sup>: known antigen. <sup>i</sup>: inner membrane. <sup>p</sup>: periplasmic. <sup>o</sup>: outer membrane. <sup>e</sup>: extracellular.

655 <sup>1</sup>: peptide sequence is only a single amino acid away from a human or mouse peptide. <sup>2</sup>: peptide is  
656 only two amino acids away from a human or mouse peptide.

657

| Protein name                                   | Accession               | Peptide                     | Scores |
|------------------------------------------------|-------------------------|-----------------------------|--------|
| <b>Aspartate--tRNA(Asp/Asn) ligase AspS</b>    | A0A0H3HT48              | TGAQDGDIIFFAADR             |        |
| Adenylosuccinate synthetase PurA               | A0A0H3HJJ2              | QDQIGITLANVVK               |        |
| Dihydrolipoyl dehydrogenase OdhL               | A0A0H3HQK7              | FPFSINGR <sup>2</sup>       |        |
| Ankyrin repeat-containing protein              | A0A0H3HJC7              | IGDAPAPNAQK                 |        |
| Phosphoribosylformylglycinamide synthase PurL  | A0A0H3HPH9              | GATETFVVLPR                 |        |
| DNA-directed RNA polymerase subunit beta RpoB  | A0A0H3HT47              | STGPYSLVTQQPLGGK            |        |
| <b>50S ribosomal protein L6 RplF</b>           | A0A0H3HQ22              | GYRPPPEPYK                  |        |
| DNA-directed RNA polymerase subunit beta RpoC  | A0A0H3HP07              | ISLYATTVGR                  |        |
| <b>Enolase Eno</b>                             | A0A0H3HLA6              | GIANSILIK <sup>2</sup>      |        |
| Uncharacterized protein                        | A0A0H3HWA2              | IDCLTNAYTAR                 |        |
| DNA gyrase subunit A GyrA                      | A0A0H3HKL0              | INVVLPVR <sup>2</sup>       |        |
| Aspartate-semialdehyde dehydrogenase Asd       | A0A0H3HW74              | VTGTLSVPVGR                 |        |
| Malic enzyme                                   | A0A0H3HP28              | AALLSNSNFGSAPSASSR          |        |
| 50S ribosomal protein L10 RplJ                 | A0A0H3HUR4              | AQTVVLAEYR                  |        |
| <b>50S ribosomal protein L6 RplF</b>           | A0A0H3HQ22              | AIIANAVHGVTK                |        |
| Glutamine synthetase GlnA                      | A0A0H3HL61              | ALNAITNPTTNSYK              |        |
| Nucleoside diphosphate kinase Ndk              | A0A0H3HJK0 <sup>e</sup> | NVIGQIYSR <sup>2</sup>      |        |
| Antioxidant protein LsfA                       | A0A0H3HGZ9              | LIITYPASTGR                 |        |
| UDP-glucose 4-epimerase                        | A0A0H3HFV2              | GYSVLEVVR                   |        |
| <b>Enolase Eno</b>                             | A0A0H3HLA6              | SAIVDIIGR <sup>2</sup>      |        |
| Acetyl-CoA acetyltransferase                   | A0A0H3HTT4              | LPLSVGCTTINK                |        |
| KHG/KDPG aldolase Eda                          | A0A0H3HGE0              | FGVSPGLTR <sup>2</sup>      |        |
| 10 kDa chaperonin GroES                        | A0A0H3HH83 <sup>a</sup> | TASGIVIPDAAAEPDQGEVLAIGPGKR |        |
| Saccharopine dehydrogenase                     | A0A0H3HIF5              | HGQLVQDVFTR                 |        |
| Citrate synthase GltA                          | A0A0H3HYU5              | YSIGQPFVYPR                 |        |
| <b>Aspartate--tRNA(Asp/Asn) ligase AspS</b>    | A0A0H3HT48              | YVAAHHPFTSPK                |        |
| Gamma-aminobutyraldehyde dehydrogenase         | A0A0H3HQU5              | SVLAAAAGNLK <sup>2</sup>    |        |
| Peptide chain release factor 2 PrfB            | A0A0H3HL96              | SYVLDQSR <sup>2</sup>       |        |
| Polyketide non-ribosomal peptide synthase      | A0A0H3HWL5 <sup>i</sup> | AWFIPLSAR <sup>2</sup>      |        |
| Transcription termination/antitermination NusG | A0A0H3HPU8              | VTGFVGGAR <sup>2</sup>      |        |
| Beta sliding clamp DnaN                        | A0A0H3HFM1              | FTFGQVELVSK                 |        |
| Malate synthase AceB                           | A0A0H3HIT5              | IATLIVRPR <sup>2</sup>      |        |
| PTS system, EIIA component                     | A0A0H3HRL4              | ISGHHLEVTPAIR               |        |
| Phosphoenolpyruvate synthase PpsA              | A0A0H3HJ13              | IFILQARPETVK                |        |
| Thiol:disulfide interchange protein DsbA       | A0A0H3HTS6 <sup>p</sup> | NYNIDGVPTIVVQGK             |        |
| RND family efflux transporter MFP subunit BpeA | A0A0H3HQZ3 <sup>i</sup> | AQANLATQNALVAR              |        |
| Inosine-5'-monophosphate dehydrogenase GuaB    | A0A0H3HJ23              | LVGIVTNR <sup>1</sup>       |        |
| Periplasmic maltose-binding protein MalE       | A0A0H3HG39 <sup>p</sup> | VNWLVIYINK                  |        |
| Putative extracellular ligand binding protein  | A0A0H3HWC6 <sup>p</sup> | VVATDAQQGPALADYAK           |        |
| Acid phosphatase AcpA                          | A0A0H3HV11 <sup>e</sup> | NIVVIYAENR                  |        |
| NADH-quinone oxidoreductase subunit F NuoF     | A0A0H3HPW5              | EGTGWLYR <sup>2</sup>       |        |
| Type VI secretion system Hcp-1                 | A0A0H3HE88 <sup>e</sup> | IGGNQGGNTQGAWSLTK           |        |
| 50S ribosomal protein L23 RplW                 | A0A0H3HT35              | AAVELLFK <sup>2</sup>       |        |
| <b>50S ribosomal protein L6 RplF</b>           | A0A0H3HQ22              | LTLVGVGYR                   |        |
| 50S ribosomal protein L17 RplQ                 | A0A0H3HPQ2              | LFDVLGPR <sup>2</sup>       |        |
| Aconitate hydratase                            | A0A0H3HVV9              | IVLESVLR <sup>1</sup>       |        |

## Shotgun Immunoproteomic for Discovery of Linear B Cell Epitopes

658

659

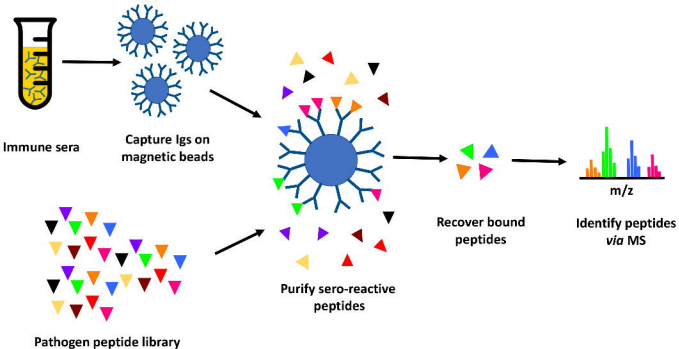

**A.**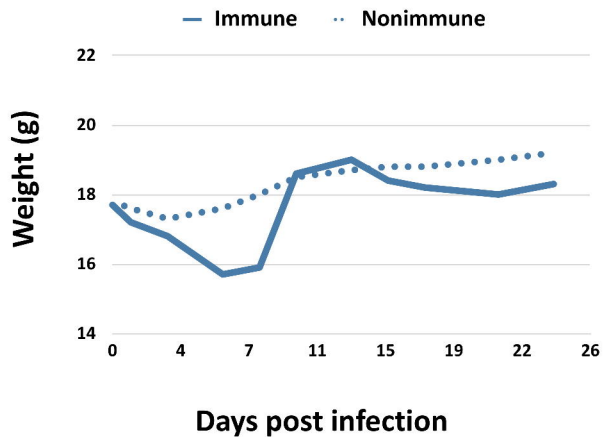**B.**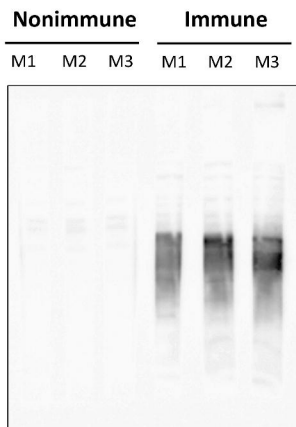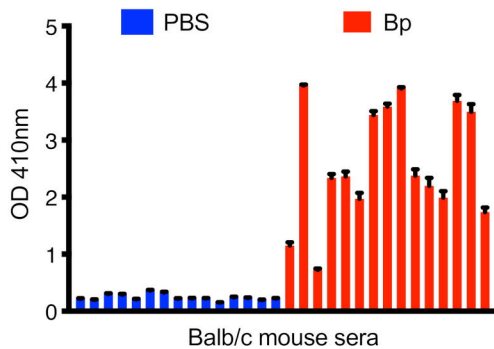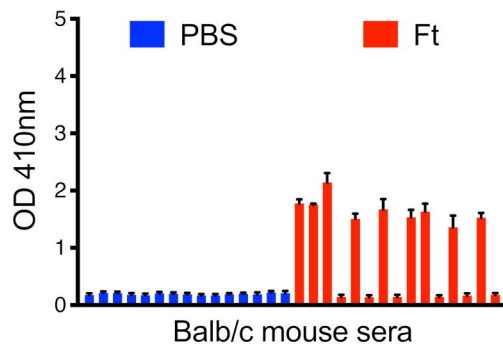

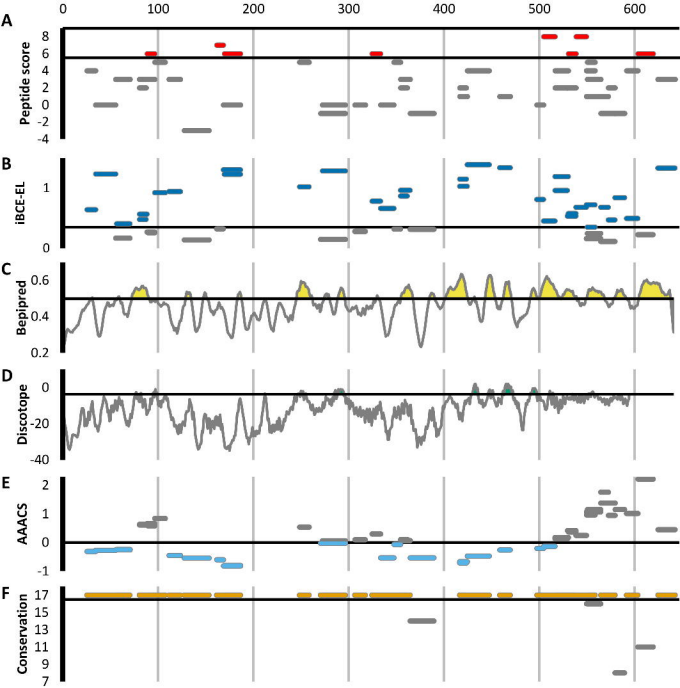

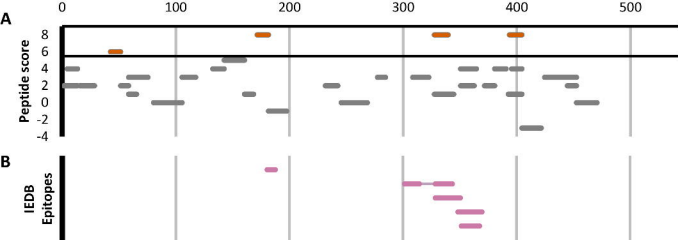

Source: https://www.biorxiv.org/content/10.1101/2021.06.08.447172v1.full.pdf
